# Supplementary material for: Reactive adsorption of CEES on iron oxyhydroxide/(N-)graphite oxide composites under visible light exposure
Source: Royal Society of Chemistry journal article supplement (doi:10.1039/c5ta04223b), 2015-01-01
Supplement: c5ta04223b1.pdf [file c5ta04223b1.pdf]

Supporting Information

**Reactive Adsorption of CEES on Iron Oxyhydroxide/(N-)Graphite  
Oxide Composites under Visible Light Exposure**

*by*

Javier A. Arcibar-Orozco<sup>a</sup>, Silvio Panettieri<sup>a, b</sup>, and Teresa J. Bandosz<sup>a, b\*</sup>

[<sup>a</sup>] Department of Chemistry, The City College of New York, New York, NY 10031, USA.

[<sup>b</sup>] The Graduate Center of the City University of New York, 365 Fifth Avenue, New York, NY,  
10016, USA.

---

\*Whom correspondence should be addressed to. Tel.: (212)650-6017; Fax: (212)650-6107); E-mail: [tbandosz@ccny.cuny.edu](mailto:tbandosz@ccny.cuny.edu)

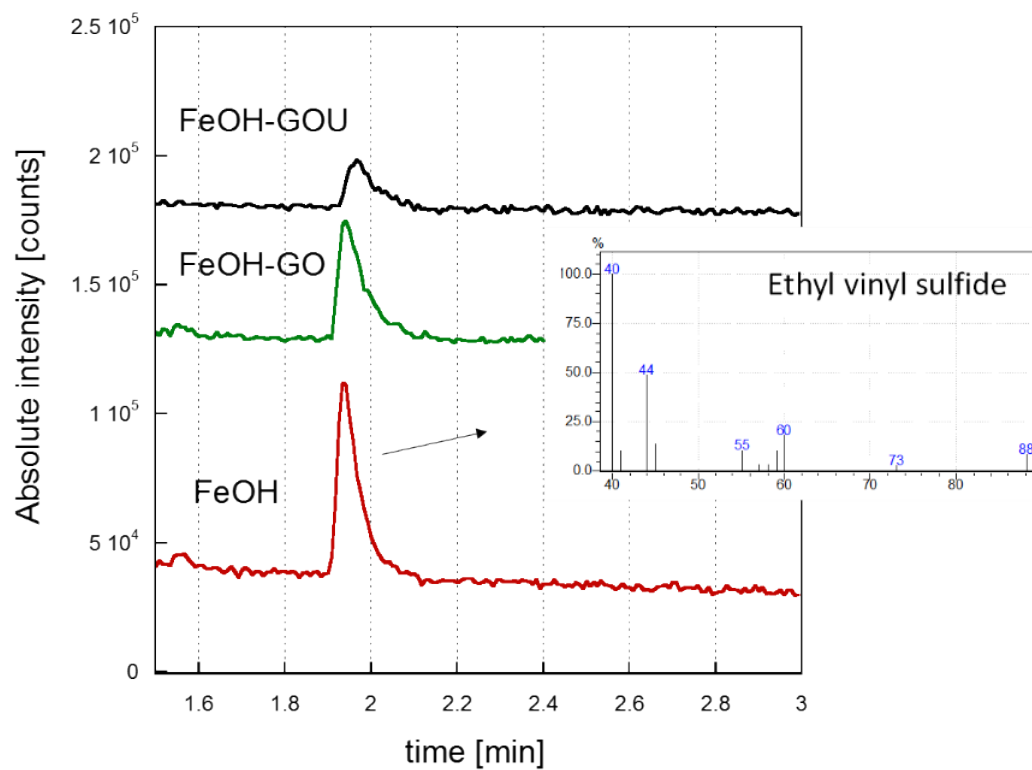

Figure S1. Chromatograph of the headspace after 24 exposure to CEES vapors for the EVS analysis window. The insert shows the mass spectrum of the peak at 1.94 min.

Figure S2. Mass spectra of the selected EPI for the identification of the compounds present in the extract from FeOH after CEES exposure.

Figure S3. Mass spectra of the selected EPI for the identification of the compounds present in the extract from FeOH-GO after CEES exposure.

Figure S3. Mass spectra of the selected EPI for the identification of the compounds present in the extract from FeOH-GOU after CEES exposure.

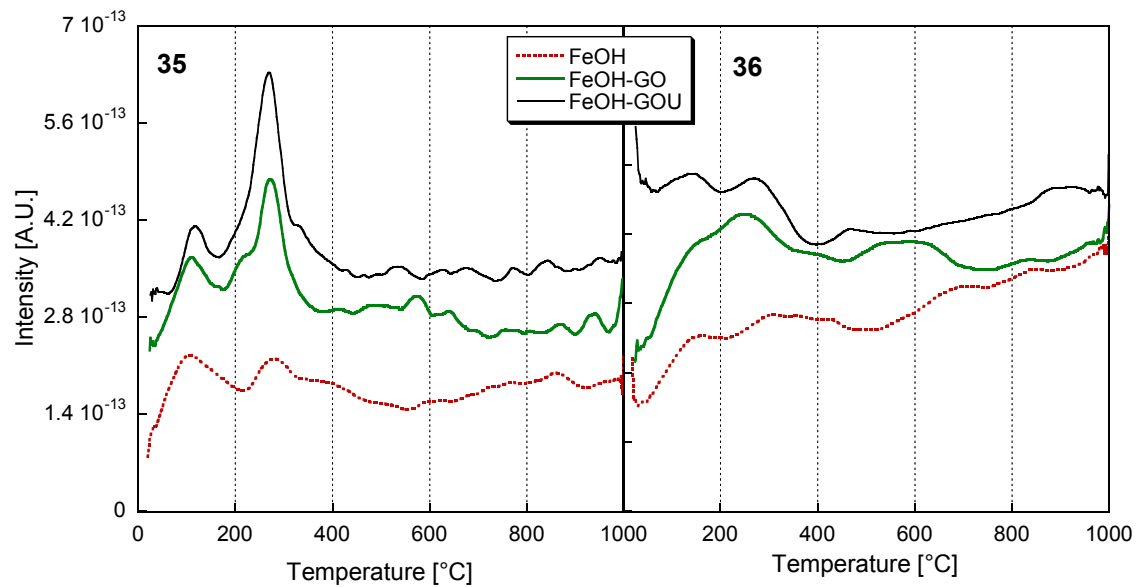

Figure S4. m/z 35 (Cl) and 36 (HCl) thermal profiles for the samples exposed to CEES
